# Supplementary material for: Exfoliated carbon nitride nanosheets decorated with NiS as an efficient noble-metal-free visible-light-driven photocatalyst for hydrogen evolution
Source: Royal Society of Chemistry journal article supplement (doi:10.1039/c5cp01657f), 2015-01-01
Supplement: c5cp01657f1.pdf [file c5cp01657f1.pdf]

## Supporting information

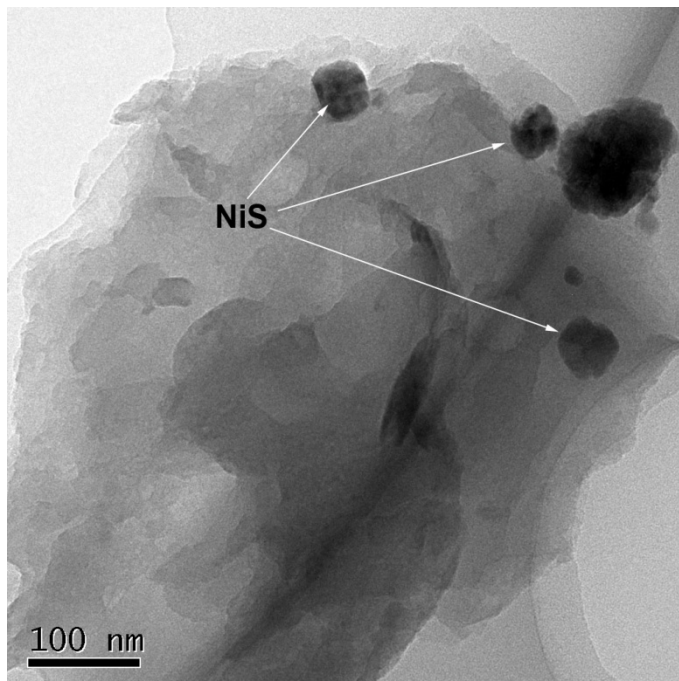

Fig. S1. The TEM image of the used photocatalyst e-C<sub>3</sub>N<sub>4</sub>/NiS-1.0.

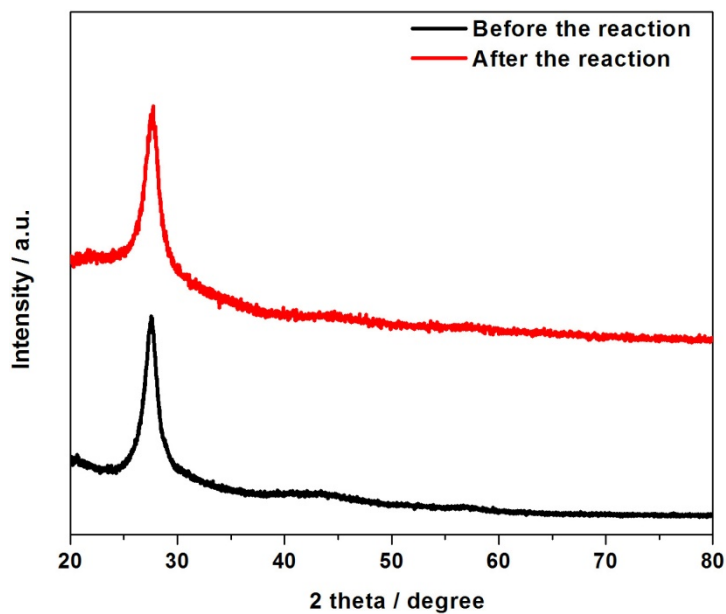

Fig. S2. The XRD patterns of the e-C<sub>3</sub>N<sub>4</sub>/NiS-1.0 before and after the photocatalytic reaction.
